# Supplementary material
Source: Springer Nature journal article supplement (https://www.springermedizin.de/resource/supplementary/12946_2009_125_MOESM6_ESM.pdf/9555616)

Perfused by the portal vein

Perfused by the shunt

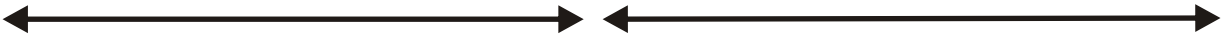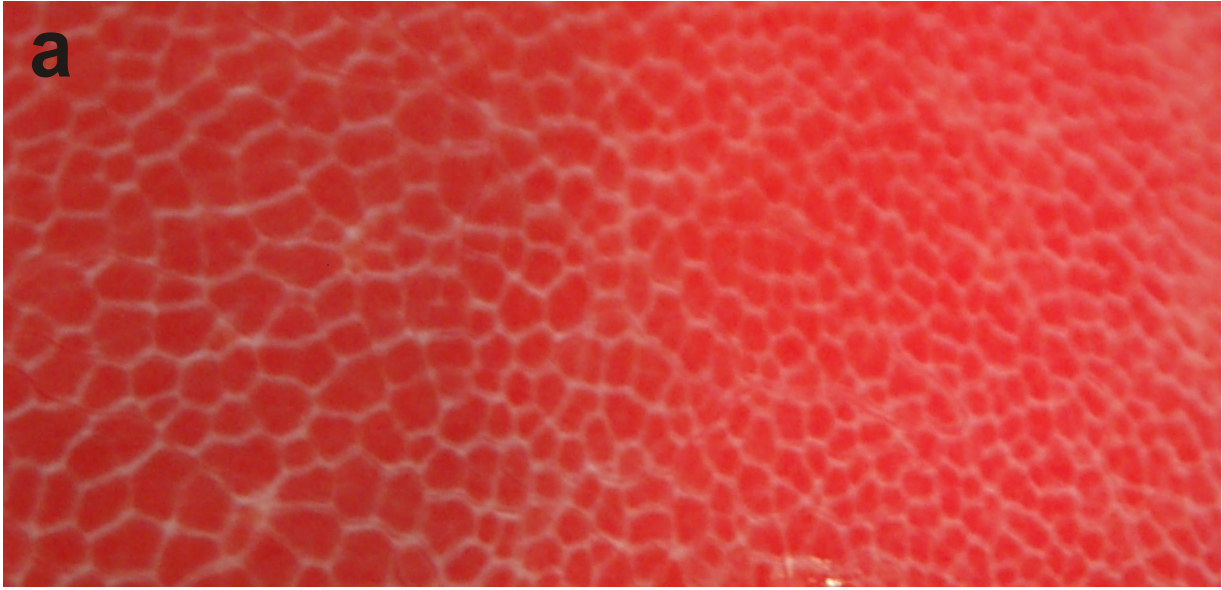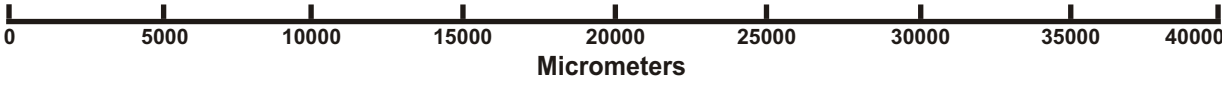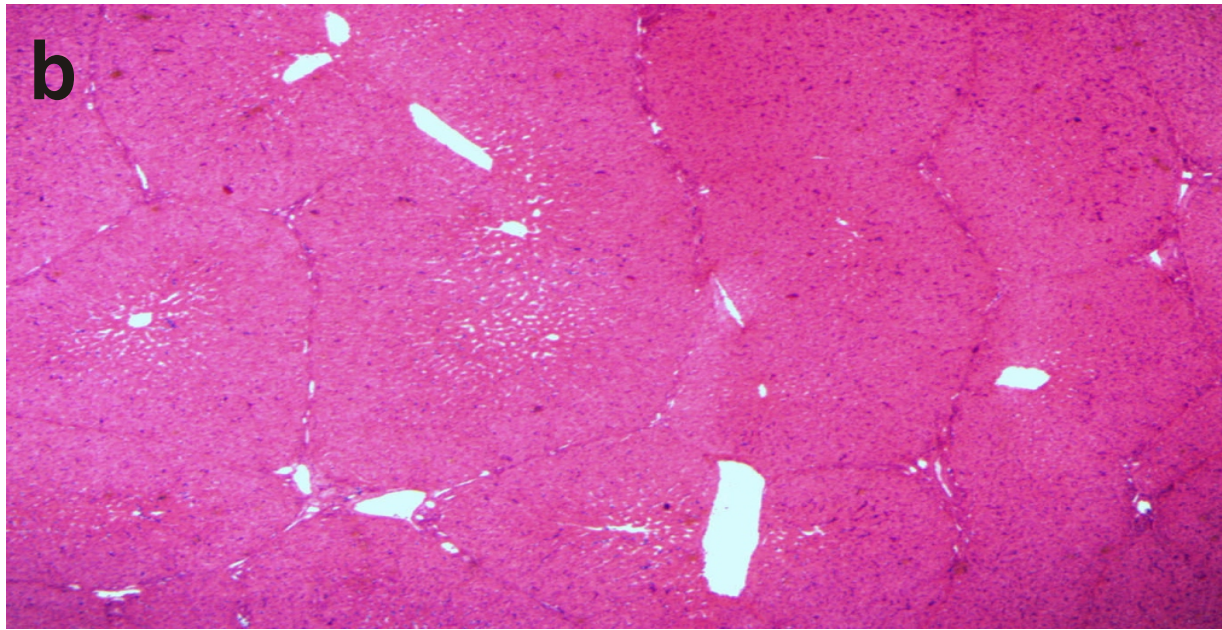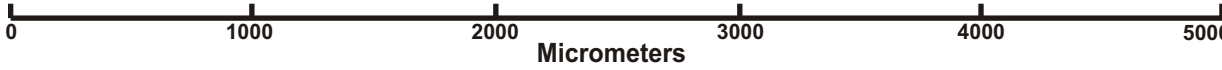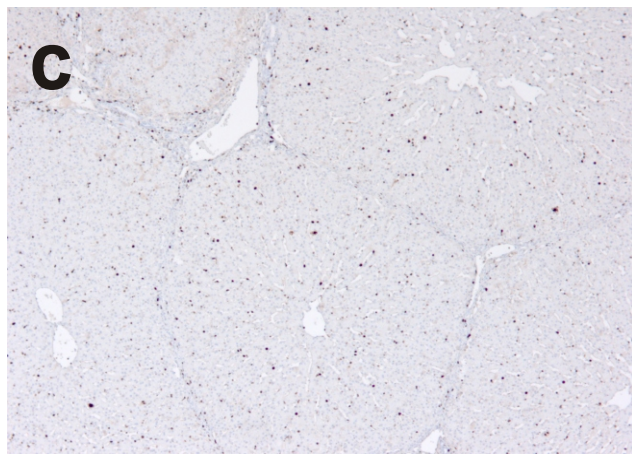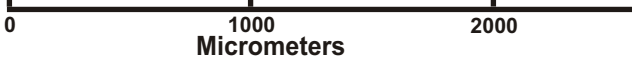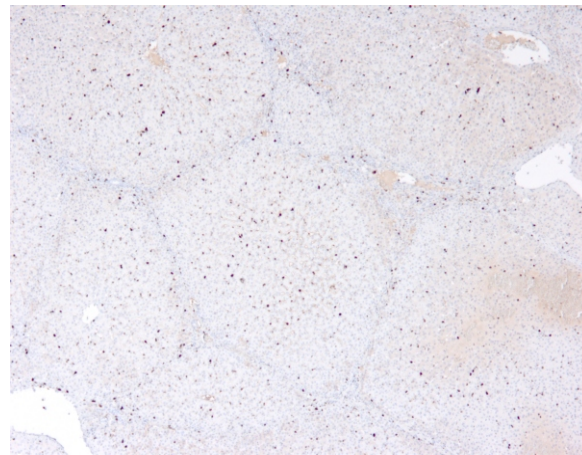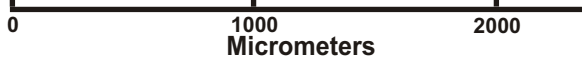

Supplement: MOESM6 [file 9555616]
